# Supplementary material for: Risk factors predicting graft-versus-host disease and relapse-free survival after allogeneic hematopoietic stem cell transplantation in relapsed or refractory non-Hodgkin’s lymphoma
Source: PubMed Central journal article supplement (PMC6591200; doi:10.1007/s00277-019-03714-x), 2019-05-14

Supplementary Figure 1. Comparison of overall survival (OS), disease-free survival (DFS), and GRFS of all patients

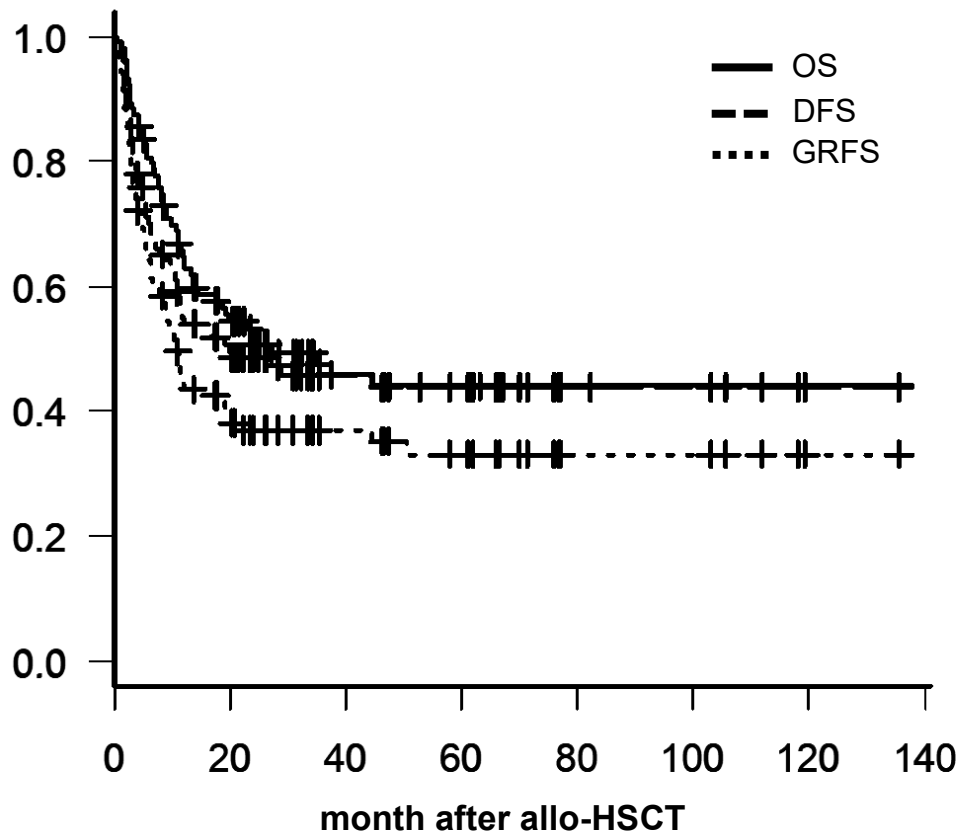

## Supplementary Figure 2. Survival outcomes according to GVHD

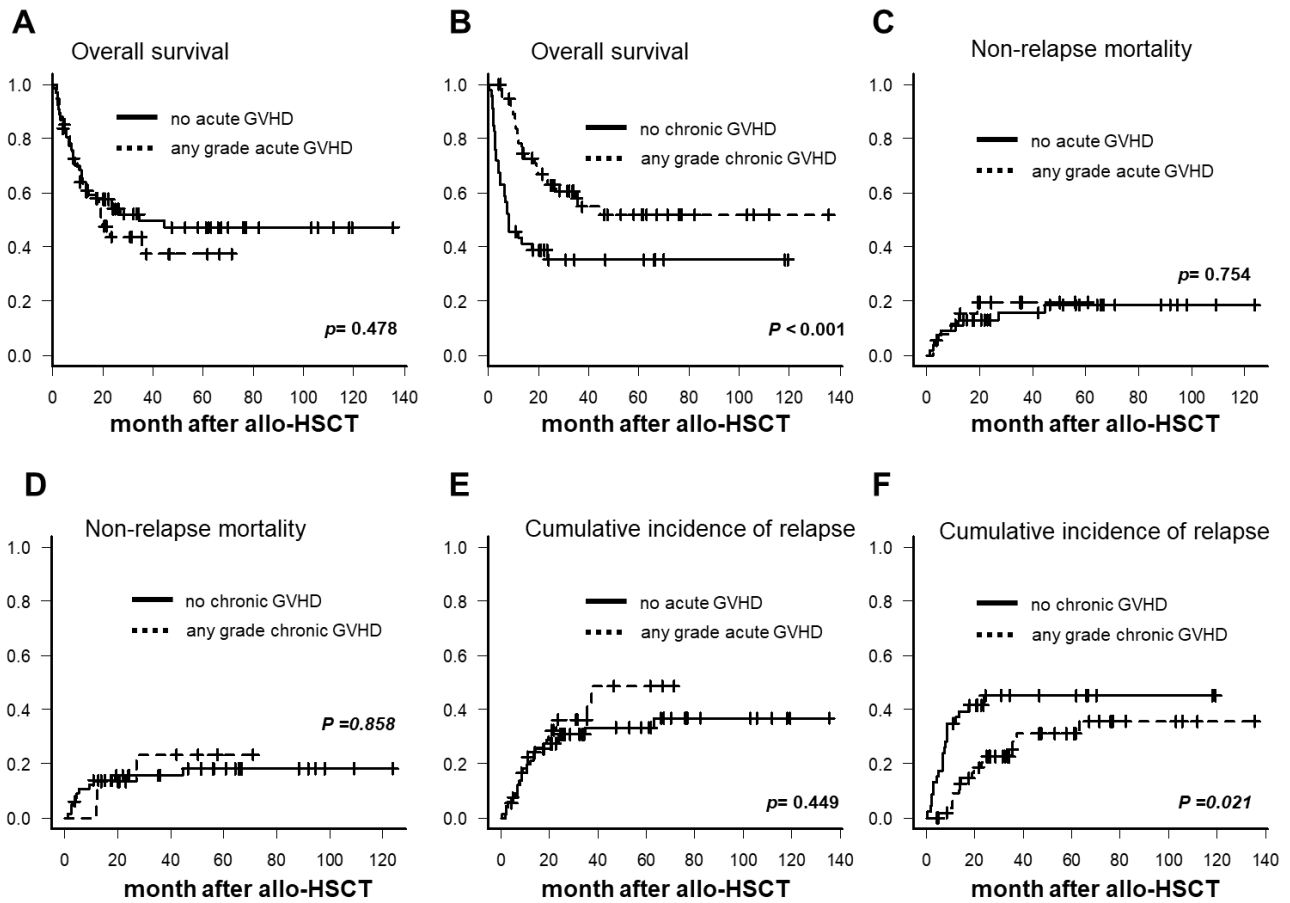

Supplement: 277_2019_3714_MOESM1_ESM.pdf [file 277_2019_3714_MOESM1_ESM.pdf]
